# Supplementary material for: Statistical discovery of site inter-dependencies in sub-molecular hierarchical protein structuring
Source: Springer Nature journal article supplement (doi:10.1186/1687-4153-2012-8), 2012-07-13

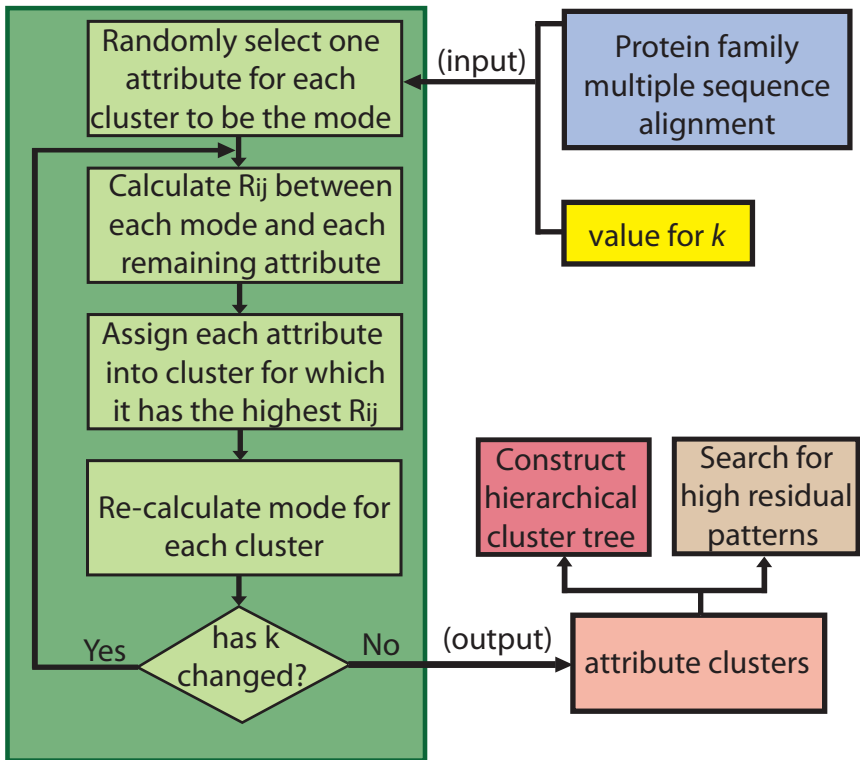

Supplement: 13637_2011_18_MOESM1_ESM.pdf [file 13637_2011_18_MOESM1_ESM.pdf]
