# Supplementary material for: Statistical discovery of site inter-dependencies in sub-molecular hierarchical protein structuring
Source: Springer Nature journal article supplement (doi:10.1186/1687-4153-2012-8), 2012-07-13
Supplement: 13637_2011_18_MOESM4_ESM.pdf [file 13637_2011_18_MOESM4_ESM.pdf]

**Module 1**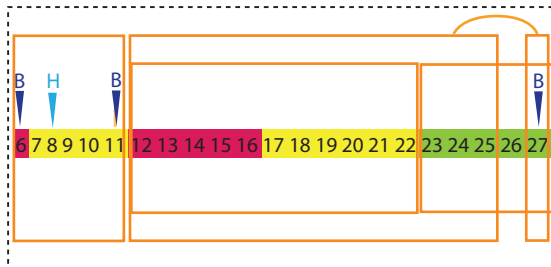**Module 3**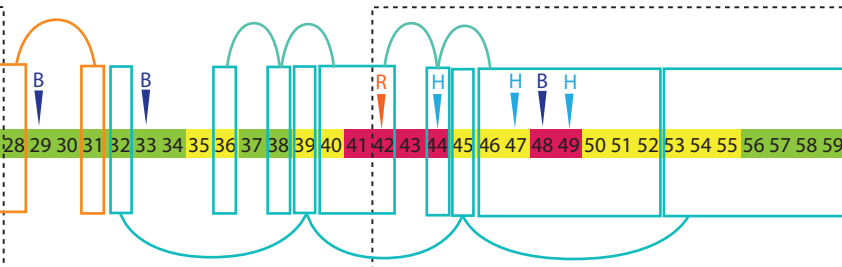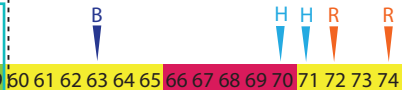**Module B****Module A****Module 2****Module 4**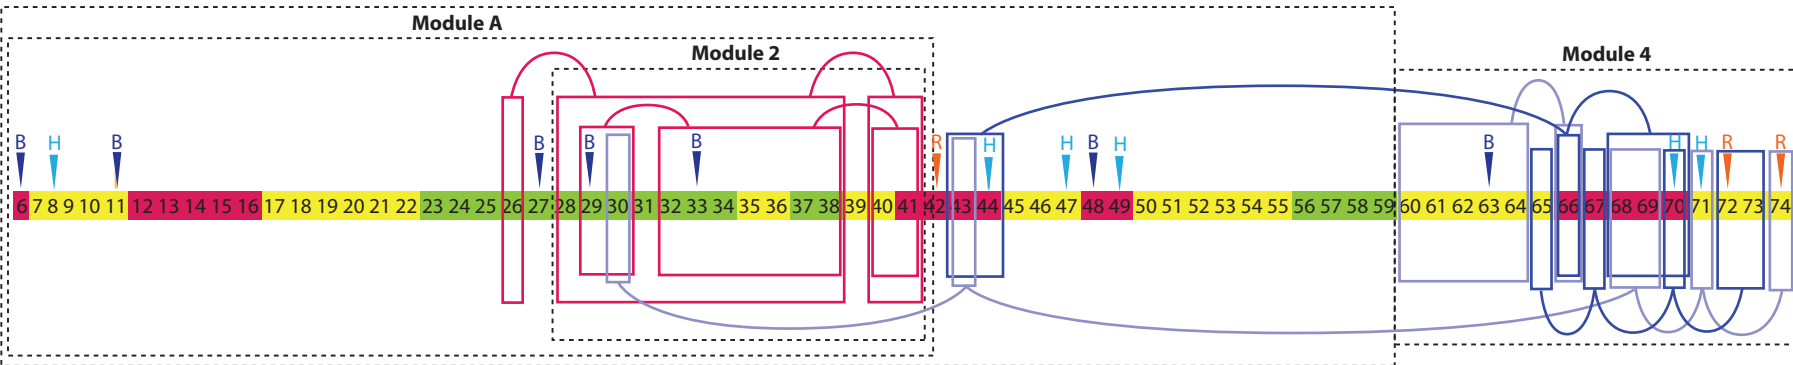

- beta strand
- loop/turn
- helix

- B binding site in Ub chain formation
- H contact points between moieties in Ub2
- R possible external recognition site

- Clusters associated with Module 1
- Clusters associated with Module 2
- Clusters associated with Module 3
- Clusters associated with Module 4
