# Supplementary material for: Statistical discovery of site inter-dependencies in sub-molecular hierarchical protein structuring
Source: Springer Nature journal article supplement (doi:10.1186/1687-4153-2012-8), 2012-07-13
Supplement: 13637_2011_18_MOESM5_ESM.pdf [file 13637_2011_18_MOESM5_ESM.pdf]

| Order (n) | 1                                                   | A                      | 2                                                          | B                     | 3                                          | 4                               | 5                                              | 6                                                                              | C                        | D                         | 7                                             | E                     | F                     |
|-----------|-----------------------------------------------------|------------------------|------------------------------------------------------------|-----------------------|--------------------------------------------|---------------------------------|------------------------------------------------|--------------------------------------------------------------------------------|--------------------------|---------------------------|-----------------------------------------------|-----------------------|-----------------------|
| 2         | (18,20)                                             |                        | (35,41)                                                    | (31,44)               | (50,55)                                    | (52,53)                         | (10,107)                                       | (92,93)                                                                        | (99,105)                 | (102,108)                 | (101,122)                                     | (116,123)             | (111,113)             |
| 3         | (18,20,49)                                          | A3 (21,23,83)          | (26,35,41)                                                 | (29,31,44) B3         |                                            | (52,54)                         | (10,37,107)                                    | (79,92,93)                                                                     | C3 (97,99,105)           | (102,108,115) D3          | (101,110,122) E3                              | (116,119,123)         | F4                    |
| 4         | (16,18,20,49)                                       | (21,23,24,83)          | (26,35,36,41)                                              | (29,31,44,53)         | (50,55,56,58)                              | (52,54,60,72)                   | (10,37,77,107)                                 | (79,92,93,120)                                                                 | (71,97,99,105)           | (102,108,113,115)         | (101,109,110,122)                             | (115,116,119,123)     | (111,113,115,124)     |
| 5         | (12,16,18,20,49)                                    | (21,23,24,27,83)       | (26,35,36,41,51)                                           | (29,31,44,46,53)      | (50,55,56,58,59)                           | (52,54,60,63,72)                | (10,37,77,78,107)                              | (79,92,93,119,120)                                                             | (71,97,99,105,112)       | (102,106,108,113,115)     | (101,109,110,118,122)                         | (115,116,119,121,123) | (111,113,124-126)     |
| 6         | (12,16,18,20,25,49)                                 | (21,23,24,27,33,83)    | (26,34-36,41,51)                                           | Straddles key site 30 | Straddles key site 55                      | (48,52,54,60,63,72)             | (10,37,77,78,81,107)                           | (79,80,92,93,119,120)                                                          | (71,95,97,99,105,112)    | (102,104,106,108,113,115) | (101,109,110,117,118,122)                     | channel axis          | (111,113,115,124-126) |
| 7         | (12,16,18,20,25,28,49)                              | retinol /TTR interface | (26,34-36,41,51,69)                                        |                       |                                            |                                 | (10,37,73,77,78,81,107)                        | (76,79,80,92,93,119,120)                                                       | tetramer interface       | channel axis              | (98,101,109,110,117,118,122)                  |                       | dimer interface       |
| 8         | (12,16,18,20,25,28,30,49)                           |                        |                                                            |                       |                                            |                                 |                                                | (76,79,80,92,93,119,120,125)                                                   |                          |                           | (98,100,101,109,110,117,118,122)              |                       |                       |
| 9         | (12,16,18,20,25,28,30,32,49)                        |                        | (26,34-36,41,45,47,51,69)                                  |                       |                                            | (48,52,54,60,63,66,67,72,74)    | (10,37,73,75,77,78,78,81,82,107)               | (76,79,80,91-93,119,120,125)                                                   |                          |                           |                                               |                       |                       |
| 10        |                                                     |                        |                                                            |                       | (44,50,55,56,58,59,88,92,97,112)           | (48,52,54,60,63,64,66,67,72,74) | (10,37,73,75,77,78,81,82,106,107)              | (70,76,79,80,91-93,119,120,125)                                                |                          |                           |                                               |                       |                       |
| 11        | (12,13,15,16,18,20,25,28,30,32,49)                  |                        | (26,34-36,41-43,45,47,51,69)                               |                       |                                            |                                 | (10,37,73,75,77,78,81,82,106,107,124)          |                                                                                |                          |                           | (98,100,101,109,110,116-118,121-123)          |                       |                       |
| 12        | (12,13,15,16,18-20,28,30,32,49)                     |                        | (26,33-36,41-43,45,47,51,69)                               |                       |                                            |                                 |                                                |                                                                                | Subdomain module: 70-126 |                           | (90,98,100,101,109,110,116-118,121-123)       |                       |                       |
| 13        | (12-16,18,20,25,28,30,32,49)                        |                        |                                                            |                       |                                            | (48,52,54,60,61,63-67,72,74,79) | (10,11,37,73,75,77,78,81-83,106,107,124)       | (70,76,79,80,91-94,96,119,120,125,126)                                         |                          |                           |                                               |                       |                       |
| 14        | (12-16,18,20,22,25,28,30,32,49)                     |                        |                                                            |                       | (44,50,52,55,56,58-60,64,74,,88,92,97,112) | (48,52,54,60,61,63-68,72,74,79) | (10,11,37,57,73,75,77,78,81-83,106,107,124)    | (68,70,76,79,80,91-94,96,119,120,125,126)                                      |                          |                           | (84,85,90,98,100,101,109,110,116-118,121-123) |                       |                       |
| 15        | (12-20,22,25,30,32,49)                              |                        | (26,29,31,33-36,41-43,45-47,51,69)                         |                       |                                            |                                 | (10,11,37,57,73,75,77,78,81-83,95,106,107,124) | (68,70,76,79,80,91-94,96,102,119,120,125,126)                                  |                          |                           |                                               |                       |                       |
| 16        |                                                     |                        | (26,29,31,33-36,41-43,45-47,51,62,69)                      |                       |                                            |                                 |                                                |                                                                                |                          |                           | (84,85,90,98,100,101,108-110,115-118,121-123) |                       |                       |
| 17        |                                                     |                        |                                                            |                       |                                            |                                 |                                                | (68,70,76,79,80,91-94,96,102,111,113,119,120,125,126)                          |                          |                           |                                               |                       |                       |
| 18        |                                                     |                        |                                                            |                       |                                            |                                 |                                                |                                                                                |                          |                           |                                               |                       |                       |
| 19        | (12-25,27,28,32,49)                                 |                        | (26,29,31,33-36,38-43,45-47,51,62,69)                      |                       |                                            |                                 |                                                | (68,70,71,76,79,80,91-94,96,97,102,111,113,119,120,125,126)                    |                          |                           |                                               |                       |                       |
| 20        | (12-25,27,28,32,49,53)                              |                        | (26,29,31,33-36,38-43,45-47,51,62,69,71)                   |                       |                                            |                                 |                                                |                                                                                |                          |                           | (84-90,93,100,101,108-110,115-118,121-123)    |                       |                       |
| 26        |                                                     |                        |                                                            |                       |                                            |                                 |                                                | (10,11,37,57,70,73,75,77,78,80-83,91,93,95,96,102,106,107,111,113,120,124-126) |                          |                           |                                               |                       |                       |
| 29        |                                                     |                        | (26,29,31,33-36,38-43,45-48,50,51,55,59-62,66,69,71,86,87) |                       |                                            |                                 |                                                |                                                                                |                          |                           |                                               |                       |                       |
| 30        | (12-25,27,28,30,32,44,49,52-54,,84,104,108,117-119) |                        |                                                            |                       |                                            |                                 |                                                |                                                                                |                          |                           |                                               |                       |                       |
| 32        |                                                     |                        |                                                            |                       |                                            |                                 |                                                | (68,76,84-90,92,94,97-101,103-105,108-110,112,114-119,121-123)                 |                          |                           |                                               |                       |                       |
| 58        |                                                     |                        |                                                            |                       |                                            |                                 |                                                | (10,11,37,56-58,63-65,67,70,72-83,85,88-103,105-107,109-116,120-126)           |                          |                           |                                               |                       |                       |

 node
